# Supplementary material for: Liver Transplantation for Hepatic Adenoma: A UNOS Database Analysis and Systematic Review of the Literature
Source: PubMed Central journal article supplement — Transplant Direct. 2022 Jan 5;8(2):e1264. doi: 10.1097/TXD.0000000000001264 (PMC8735769; doi:10.1097/txd.0000000000001264), 2022-01-05
Supplement: txd-8-e1264-s001.pdf [file txd-8-e1264-s001.pdf]

**Supplemental Table 1. Univariable Fine-Gray Competing Risks Regression Analysis of Waitlist Mortality in the UNOS Database**

| <b>Characteristic at listing</b>           | <b>n</b> | <b>sHR (95% CI)</b> | <b>p-value</b> |
|--------------------------------------------|----------|---------------------|----------------|
| Age (years)                                | 199      | 1.07 (1.02-1.12)    | <b>0.002</b>   |
| Male sex (ref: female)                     | 199      | 1.75 (0.63-4.89)    | 0.28           |
| BMI (kg/m <sup>2</sup> )                   | 193      | 1.02 (0.94-1.09)    | 0.69           |
| Laboratory PELD/MELD score                 | 155      | 1.06 (1.01-1.10)    | <b>0.02</b>    |
| Albumin (g/dL)                             | 164      | 0.42 (0.26-0.70)    | <b>0.001</b>   |
| Bilirubin (mg/dL)                          | 164      | 1.02 (0.94-1.11)    | 0.62           |
| INR                                        | 164      | 3.24 (1.62-6.48)    | <b>0.001</b>   |
| Serum creatinine (mg/dL)                   | 163      | 1.62 (1.16-2.24)    | <b>0.004</b>   |
| Serum sodium (mEq/L)                       | 144      | 0.99 (0.80-1.24)    | 0.97           |
| Ascites (reference: no)                    | 160      | 3.59 (1.20-10.79)   | <b>0.02</b>    |
| Encephalopathy (reference: no)             | 159      | 3.00 (0.90-9.96)    | 0.07           |
| Dialysis within prior week (reference: no) | 161      | 4.62 (0.63-34.04)   | 0.13           |
| On life support (reference: no)            | 199      | 10.93 (1.73-68.92)  | <b>0.01</b>    |

Abbreviations: BMI = body mass index; CI = confidence interval; INR = international normalized ratio; MELD = Model for End-stage Liver Disease; PELD = Pediatric End-stage Liver Disease; sHR = subdistribution hazard ratio; UNOS = United Network for Organ Sharing.

Note: No patient with PVT or who underwent ablation experienced waitlist mortality, and thus these variables were not included in the table.

**Supplemental Table 2. Univariable Cox Regression Analysis of Patient Mortality and Graft Loss in the UNOS Database**

| Characteristic at listing                  | n   | Patient Mortality |              | Graft Loss        |              |
|--------------------------------------------|-----|-------------------|--------------|-------------------|--------------|
|                                            |     | HR (95% CI)       | p-value      | HR (95% CI)       | p-value      |
| Age (years)                                | 142 | 1.03 (1.00-1.06)  | <b>0.02</b>  | 1.01 (0.99-1.03)  | 0.57         |
| Male sex (ref: female)                     | 142 | 2.34 (1.01-5.43)  | <b>0.049</b> | 1.75 (0.85-3.61)  | 0.13         |
| BMI (kg/m <sup>2</sup> )                   | 142 | 1.02 (0.95-1.08)  | 0.64         | 1.00 (0.95-1.05)  | 0.96         |
| Laboratory PELD/MELD score                 | 110 | 1.08 (1.03-1.13)  | <b>0.001</b> | 1.06 (1.02-1.10)  | <b>0.002</b> |
| Albumin (g/dL)                             | 140 | 0.54 (0.34-0.85)  | <b>0.01</b>  | 0.63 (0.44-0.92)  | <b>0.02</b>  |
| Bilirubin (mg/dL)                          | 141 | 1.01 (0.97-1.05)  | 0.54         | 1.02 (0.99-1.05)  | 0.25         |
| INR                                        | 116 | 1.34 (0.70-2.59)  | 0.38         | 1.51 (0.94-2.43)  | 0.09         |
| Serum creatinine (mg/dL)                   | 142 | 1.21 (0.97-1.51)  | 0.09         | 1.08 (0.85-1.37)  | 0.53         |
| Serum sodium (mEq/L)                       | 103 | 0.85 (0.74-0.98)  | <b>0.03</b>  | 0.89 (0.79-0.99)  | <b>0.04</b>  |
| Ascites (reference: no)                    | 107 | 3.09 (1.10-8.69)  | <b>0.03</b>  | 1.88 (0.78-4.55)  | 0.16         |
| Encephalopathy (reference: no)             | 107 | 3.41 (1.24-9.43)  | <b>0.02</b>  | 1.81 (0.72-4.55)  | 0.21         |
| PVT (reference: no)                        | 121 | 0.78 (0.18-3.36)  | 0.74         | 0.76 (0.23-2.51)  | 0.65         |
| Dialysis within prior week (reference: no) | 131 | 2.90 (0.67-12.51) | 0.15         | 1.61 (0.38-6.73)  | 0.52         |
| On life support (reference: no)            | 141 | 4.01 (1.19-13.53) | <b>0.03</b>  | 4.09 (1.59-10.55) | <b>0.004</b> |

Abbreviations: BMI = body mass index; CI = confidence interval; HR = hazard ratio; INR = international normalized ratio; MELD = Model for End-stage Liver Disease; PELD = Pediatric End-stage Liver Disease; PVT = portal vein thrombosis; UNOS = United Network for Organ Sharing.
